# Supplementary figures and images for: In situ TEMPO surface functionalization of nanocellulose membranes for enhanced adsorption of metal ions from aqueous medium
Source: Royal Society of Chemistry journal article supplement (doi:10.1039/c6ra25707k), 2017-01-01

### Supporting information

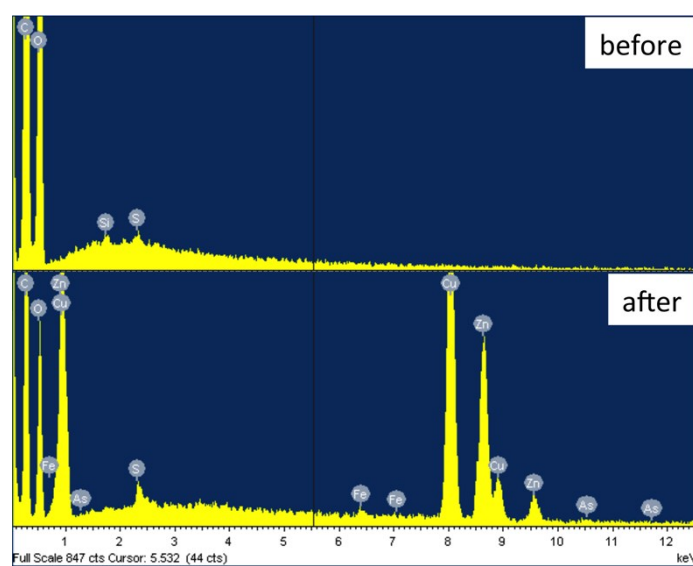

*Figure S1: EDS images of membranes, before and after adsorption*

Supplement: c6ra25707k1.pdf [file c6ra25707k1.pdf]
